# Supplementary material for: High-Fidelity Hybrid Simulation Not Only Optimizes Skills Acquisition But Improves Non-Technical Skills
Source: Research Square preprint supplement (doi:10.21203/rs.3.rs-110369/v1), 2020-12-02
Supplement: Supplementary file 1 [file 4edebb7e6a4ab40c234e8112.pdf]

## Direct observation of procedures skills (DOPS) for Knee Arthrocentesis (English Version)

| Please rate the following items                                                                                                                                                                                                                                                                                                                                                                                    | 1 | 2 | 3 | 4                                   | 5 | 6 | 7 |
|--------------------------------------------------------------------------------------------------------------------------------------------------------------------------------------------------------------------------------------------------------------------------------------------------------------------------------------------------------------------------------------------------------------------|---|---|---|-------------------------------------|---|---|---|
| <b>1. Indication, relevant anatomy and procedure technique</b><br>- Explains why the procedure is necessary<br>- Performs knee physical exam (examines patellar and femoral landmarks)<br>- Orders knee x-rays prior to the procedure                                                                                                                                                                              |   |   |   |                                     |   |   |   |
| <b>2. Obtains written informed consent</b><br>- Explains the procedure and possible complications (pain, bleeding, infection)<br>- Asks patient for any inquiries and resolves them<br>- Completes written consent form with patient signature                                                                                                                                                                     |   |   |   |                                     |   |   |   |
| <b>3. Procedure preparation</b><br>- Prepares required materials for the procedure: sterile gloves, 20cc syringe, sterile needles, sterile drape, betadine, gauze swabs, testing tubes (for cell count, gram stain, culture, and crystal analysis). Does not prepare local anesthetics. Prepares medication if therapeutic procedure                                                                               |   |   |   |                                     |   |   |   |
| <b>4. Communication skills and consideration for patient wellbeing</b><br>- Introduces herself/himself and greets the patient<br>- Shows consideration for patient comfort during the procedure<br>- Warns patient prior to the start of the procedure<br>- Maintains adequate communication with the patient during the whole procedure                                                                           |   |   |   |                                     |   |   |   |
| <b>5. Sterile technique</b><br>- Uses skin cleansing solution from the puncture site outwards<br>- Positions sterile drapes or fenestrated drape accordingly<br>- Completes sterile procedure                                                                                                                                                                                                                      |   |   |   |                                     |   |   |   |
| <b>6. Technical ability</b><br>- Palpation of landmarks and marks puncture site for superolateral puncture<br>- Off hand lateralizes patella and puncture site is in proximal third of the patella<br>- Avoids lumen collapse with synovial tissue by gently rotating needle<br>- Makes only a single skin puncture. Avoids bony structures. If she/he hits a bone, repositions without pulling needle out of skin |   |   |   |                                     |   |   |   |
| <b>7. Ask for assistance if required</b><br>- If she/he cannot complete the procedure, asks for assistance from a senior surgeon<br>- Informs patient of not being able to complete the procedure and that he will ask for assistance                                                                                                                                                                              |   |   |   |                                     |   |   |   |
| <b>8. Post procedure care</b><br>- Changes needles to fill tubes<br>- Fills tubes with the required amount of synovial liquid<br>- Fills exam orders for the tubes (cell count, gram stain, culture, and crystal analysis)<br>- Explains to the patient post procedure care<br>- Disposes needles in medical sharps container                                                                                      |   |   |   |                                     |   |   |   |
| <b>9. Professionalism</b><br>- Is honest and empathic with the patient<br>- Shows interest in granting quality medical attention                                                                                                                                                                                                                                                                                   |   |   |   |                                     |   |   |   |
| <b>10. Respect with assistant and health team</b><br>- Communicates and collaborates effectively and respectfully with the health team assistant                                                                                                                                                                                                                                                                   |   |   |   |                                     |   |   |   |
| <b>11. Overall performance</b><br>- Executes the procedure fluid and confidently                                                                                                                                                                                                                                                                                                                                   |   |   |   |                                     |   |   |   |
| Notes for structured feedback                                                                                                                                                                                                                                                                                                                                                                                      |   |   |   |                                     |   |   |   |
| Student's Name                                                                                                                                                                                                                                                                                                                                                                                                     |   |   |   | Student's Signature after Feedback  |   |   |   |
| Assessor's Name                                                                                                                                                                                                                                                                                                                                                                                                    |   |   |   | Assessor's Signature after Feedback |   |   |   |
