# Supplementary material for: High-Fidelity Hybrid Simulation Not Only Optimizes Skills Acquisition But Improves Non-Technical Skills
Source: Research Square preprint supplement (doi:10.21203/rs.3.rs-110369/v1), 2020-12-02
Supplement: Supplementary file 2 [file c920f3fd8a1e80fd42c26114.pdf]

## Direct observation of procedures skills (DOPS) for Knee Arthrocentesis (Spanish Version)

### Por favor evalúe los siguientes ítems

|                                                                                                                                                                                                                                                                                                                                                                                                                                                                                               | 1 | 2 | 3 | 4                  | 5 | 6 | 7 |
|-----------------------------------------------------------------------------------------------------------------------------------------------------------------------------------------------------------------------------------------------------------------------------------------------------------------------------------------------------------------------------------------------------------------------------------------------------------------------------------------------|---|---|---|--------------------|---|---|---|
| <b>1. Comprensión de indicaciones, aspectos anatómicos relevantes y técnica del procedimiento</b> <ul style="list-style-type: none"> <li>- Fundamenta al paciente el procedimiento</li> <li>- Realiza examen físico (palpa hitos relevantes: rótula y fémur)</li> <li>- Solicita radiografía (AP, lateral, axial de rótula) en caso de no contar con una previa</li> </ul>                                                                                                                    |   |   |   |                    |   |   |   |
| <b>2. Obtención del consentimiento informado</b> <ul style="list-style-type: none"> <li>- Explica al paciente el procedimiento y sus complicaciones (dolor, sangrado, infección)</li> <li>- Pregunta al paciente si tiene dudas y responde sus inquietudes</li> <li>- Firma consentimiento informado y solicita firma al paciente</li> </ul>                                                                                                                                                  |   |   |   |                    |   |   |   |
| <b>3. Preparación previa al procedimiento</b> <ul style="list-style-type: none"> <li>- Prepara los insumos necesarios: guantes estériles, jeringa de 20cc, aguja para tubos, pincelador, paño perforado, clorhexidina, gasa o algodón, recipiente tubos: verde (heparinizado), rodo (estéril) y hemocultivo. No carga anestésico local. Prepara medicamento si la punción es terapéutica</li> </ul>                                                                                           |   |   |   |                    |   |   |   |
| <b>4. Habilidades comunicativas y consideración por el bienestar del paciente</b> <ul style="list-style-type: none"> <li>- Se presenta y saluda al paciente al inicio</li> <li>- Muestra preocupación por la comodidad del paciente</li> <li>- Advierte al paciente al momento de iniciar el procedimiento</li> <li>- Mantiene comunicación cordial y fluida con el paciente a lo largo del procedimiento</li> </ul>                                                                          |   |   |   |                    |   |   |   |
| <b>5. Técnica aséptica</b> <ul style="list-style-type: none"> <li>- Pincela desde el sitio de punción hacia la periferia</li> <li>- Instala campo estéril alrededor del sitio de punción</li> <li>- Mantiene asepsia a lo largo del procedimiento</li> </ul>                                                                                                                                                                                                                                  |   |   |   |                    |   |   |   |
| <b>6. Habilidad en la técnica</b> <ul style="list-style-type: none"> <li>- Palpa estructuras guía (rótula, fémur) y ubica sitio de punción</li> <li>- Lateraliza rótula e ingresa en tercio superolateral</li> <li>- Evita oclusión del lumen por membrana sinovial (gira aguja en caso necesario)</li> <li>- Realiza una sola punción en la piel. Evita contacto de la aguja contra estructuras óseas. Si contacta alguna, retira levemente y modifica la dirección de la punción</li> </ul> |   |   |   |                    |   |   |   |
| <b>7. Solicitud de ayuda en caso necesario</b> <ul style="list-style-type: none"> <li>- En caso de no poder realizar la punción solicita ayuda a otro médico</li> <li>- Reporta al paciente las dificultades y le menciona que solicitará ayuda</li> </ul>                                                                                                                                                                                                                                    |   |   |   |                    |   |   |   |
| <b>8. Manejo post procedimiento</b> <ul style="list-style-type: none"> <li>- Realiza cambio de aguja al llenar frascos para estudio de líquido</li> <li>- Rellena los tunos con líquidos correctamente (al menos 2ml en cada tubo)</li> <li>- Llena órdenes para estudio de líquido: cultivo corriente, tinción de Gram y cristales</li> <li>- Entrega indicaciones post procedimiento al ayudante</li> <li>- Elimina material cortopunzante</li> </ul>                                       |   |   |   |                    |   |   |   |
| <b>9. Profesionalismo</b> <ul style="list-style-type: none"> <li>- Demuestra honestidad y empatía con el paciente</li> <li>- Demuestra compromiso con brindar una atención de calidad</li> </ul>                                                                                                                                                                                                                                                                                              |   |   |   |                    |   |   |   |
| <b>10. Respeto con el personal de salud</b> <ul style="list-style-type: none"> <li>- Se comunica y colabora de manera eficiente y respetuosa con el equipo de salud, estableciendo roles y funciones</li> </ul>                                                                                                                                                                                                                                                                               |   |   |   |                    |   |   |   |
| <b>11. Desempeño general del procedimiento</b> <ul style="list-style-type: none"> <li>- Realiza procedimiento de forma ordenada. Entrega confianza y seguridad</li> </ul>                                                                                                                                                                                                                                                                                                                     |   |   |   |                    |   |   |   |
| Notas para retroalimentación estructurada                                                                                                                                                                                                                                                                                                                                                                                                                                                     |   |   |   |                    |   |   |   |
| Nombre estudiante                                                                                                                                                                                                                                                                                                                                                                                                                                                                             |   |   |   | Firma estudiante   |   |   |   |
| Nombre evaluador(a)                                                                                                                                                                                                                                                                                                                                                                                                                                                                           |   |   |   | Firma evaluador(a) |   |   |   |
